# Supplementary material
Source: PubMed Central journal article supplement (PMC11113890)
Supplement: 18_2015_1875_MOESM1_ESM.pdf [file 18_2015_1875_MOESM1_ESM.pdf]

**Supplementary Table 2** Homology analysis of *IFNA* family genes

| Gene Symbol   | Accession number | CDS      | Homology          | Gene length, bp | Homology         |
|---------------|------------------|----------|-------------------|-----------------|------------------|
| <i>IFNA1</i>  | AB578886.1       | 68 - 637 | 570 / 570 (100%)  | 876             | 876/ 876 (100%)  |
| <i>IFNA2</i>  | NM_000605.3      | 69 - 635 | 510 / 570 (89.5%) | 1143            | 709/ 883 (80.3%) |
| <i>IFNA4</i>  | NM_021068.2      | 69 - 638 | 503 / 570 (88.2%) | 982             | 697/ 879 (79.3%) |
| <i>IFNA5</i>  | NM_002169.2      | 58 - 627 | 512 / 570 (89.8%) | 700             | 616/ 702 (87.7%) |
| <i>IFNA6</i>  | NM_021002.2      | 1 - 570* | 518 / 570 (90.9%) | 570             | 518/ 570 (90.9%) |
| <i>IFNA7</i>  | NM_021057.2      | 41 - 610 | 495 / 570 (86.8%) | 737             | 611/ 743 (82.2%) |
| <i>IFNA8</i>  | NM_002170.3      | 31 - 600 | 499 / 570 (87.5%) | 1039            | 664/ 853 (77.8%) |
| <i>IFNA10</i> | NM_002171.2      | 47 - 616 | 499 / 570 (87.5%) | 963             | 671/ 857 (78.3%) |
| <i>IFNA13</i> | NM_006900.3      | 67 - 639 | 569 / 570 (99.8%) | 705             | 699/ 705 (99.1%) |
| <i>IFNA14</i> | NM_002172.2      | 45 - 614 | 514 / 570 (90.2%) | 778             | 650/ 782 (83.1%) |
| <i>IFNA16</i> | NM_002173.2      | 7 - 576  | 496 / 570 (87.0%) | 939             | 638/ 817 (78.1%) |
| <i>IFNA17</i> | NM_021268.2      | 50 - 619 | 503 / 570 (88.2%) | 980             | 682/ 866 (78.8%) |
| <i>IFNA21</i> | NM_002175.2      | 49 - 618 | 509 / 570 (89.3%) | 1024            | 686/ 861 (79.7%) |

\**IFNA6* sequence (NM\_021002.2) is the protein-coding sequence only.
