# Supplementary material
Source: PubMed Central journal article supplement (PMC11113890)
Supplement: 18_2015_1875_MOESM2_ESM.pdf [file 18_2015_1875_MOESM2_ESM.pdf]

**Supplementary Table 3** Homology searches of primers used to detect the indicated IFN- $\alpha$ 1 mRNA/AS RNA<sup>a</sup> against *IFNA* gene subtypes.  
**IFN- $\alpha$ 2 mRNA/AS RNA**

Forward PCR primer: F1B, 5'-GTGGGCTGTGATCTGCCTCAAAC-3' to detect IFN- $\alpha$ 2 mRNA/AS RNA

| Gene Symbol   | Homology       | Sequence (Location in the gene)         |
|---------------|----------------|-----------------------------------------|
| <i>IFNA2</i>  | 23 / 23 (100%) | 5'-GTGGGCTGTGATCTGCCTCAAAC-3' (132-154) |
| <i>IFNA4</i>  | 21 / 23 (91%)  | 5'-CTGGGCTGTGATCTGCCTCAGAC-3' (132-154) |
| <i>IFNA5</i>  | 21 / 23 (91%)  | 5'-CTGGGCTGTGATCTGCCTCAGAC-3' (121-143) |
| <i>IFNA7</i>  | 21 / 23 (91%)  | 5'-CTGGGCTGTGATCTGCCTCAGAC-3' (104-126) |
| <i>IFNA8</i>  | 21 / 23 (91%)  | 5'-CTGGGCTGTGATCTGCCTCAGAC-3' (94-116)  |
| <i>IFNA16</i> | 21 / 23 (91%)  | 5'-CTGGGCTGTGATCTGCCTCAGAC-3' (70-92)   |
| <i>IFNA21</i> | 21 / 23 (91%)  | 5'-CTGGGCTGTGATCTGCCTCAGAC-3' (112-134) |
| <i>IFNA6</i>  | 20 / 23 (87%)  | 5'-CTGGACTGTGATCTGCCTCAGAC-3' (64-86)   |
| <i>IFNA10</i> | 20 / 23 (87%)  | 5'-CTAGGCTGTGATCTGCCTCAGAC-3' (110-132) |
| <i>IFNA14</i> | 20 / 23 (87%)  | 5'-CTGGGCTGTAATCTGTCTCAAAC-3' (108-130) |
| <i>IFNA17</i> | 20 / 23 (87%)  | 5'-CTAGGCTGTGATCTGCCTCAGAC-3' (113-135) |
| <i>IFNA1</i>  | 19 / 23 (83%)  | 5'-CTGGGCTGTGATCTCCCTGAGAC-3' (131-153) |
| <i>IFNA13</i> | 19 / 23 (83%)  | 5'-CTGGGCTGTGATCTCCCTGAGAC-3' (133-155) |

Reverse PCR primer: R1, 5'-AGGGATGGTTTCAGCCTTTTG-3' to detect IFN- $\alpha$ 2 mRNA/AS RNA

| Gene Symbol   | Homology       | Sequence (Location in the gene)       |
|---------------|----------------|---------------------------------------|
| <i>IFNA2</i>  | 21 / 21 (100%) | 5'-AGGGATGGTTTCAGCCTTTTG-3' (299-279) |
| <i>IFNA6</i>  | 18 / 21 (86%)  | 5'-AGAGATGGCTTCAGCCTCTG-3' (234-214)  |
| <i>IFNA4</i>  | 17 / 21 (81%)  | 5'-AGAGATGGCTTGAGCCTCTG-3' (302-282)  |
| <i>IFNA5</i>  | 17 / 21 (81%)  | 5'-AGAGATGGCTTGAGCCTCTG-3' (291-271)  |
| <i>IFNA8</i>  | 17 / 21 (81%)  | 5'-AGAGATGGCTTGAGCCTCTG-3' (264-244)  |
| <i>IFNA10</i> | 17 / 21 (81%)  | 5'-AGAGATGGCTTGAGCCTCTG-3' (280-260)  |
| <i>IFNA16</i> | 17 / 21 (81%)  | 5'-AGAGATGGCTTGAGCCTCTG-3' (240-220)  |
| <i>IFNA21</i> | 17 / 21 (81%)  | 5'-AGAGATGGCTTGAGCCTCTG-3' (282-262)  |
| <i>IFNA1</i>  | 16 / 21 (76%)  | 5'-AGAGATGGCTGGAGCCTCTG-3' (301-281)  |
| <i>IFNA13</i> | 16 / 21 (76%)  | 5'-AGAGATGGCTGGAGCCTCTG-3' (303-283)  |
| <i>IFNA17</i> | 12 / 21 (57%)  | 5'-TCAAATGTTTTCAGCAGTGTA-3' (246-226) |
| <i>IFNA7</i>  | 11 / 21 (52%)  | 5'-TGGGCTGTGATCTGCCTCAGA-3' (633-613) |
| <i>IFNA14</i> | 11 / 21 (52%)  | 5'-TCAAATGTTTTCAGGAGTGTA-3' (467-447) |

**IFN- $\alpha$ 4 mRNA/AS RNA**

Forward PCR primer: F1B, 5'-ACATGATTTCCGATTCCTCCAGGAGGAG-3' to detect IFN- $\alpha$ 4 mRNA/AS RNA

| Gene Symbol   | Homology       | Sequence (Location in the gene)              |
|---------------|----------------|----------------------------------------------|
| <i>IFNA4</i>  | 28 / 28 (100%) | 5'-ACATGATTTCCGATTCCTCCAGGAGGAG-3' (236-263) |
| <i>IFNA7</i>  | 25 / 28 (89%)  | 5'-ACATGATTTCCGATTCCTCCAGGAGGAG-3' (208-235) |
| <i>IFNA10</i> | 25 / 28 (89%)  | 5'-ACATGATTTCCGATTCCTCCAGGAGGAG-3' (214-241) |
| <i>IFNA16</i> | 25 / 28 (89%)  | 5'-ATATGATTTCCGATTCCTCCAGGAGGAG-3' (174-201) |
| <i>IFNA21</i> | 25 / 28 (89%)  | 5'-ACATGATTTCCGATTCCTCCAGGAGGAG-3' (216-243) |
| <i>IFNA1</i>  | 24 / 28 (86%)  | 5'-ACATGATTTCCGATTCCTCCAGGAGGAG-3' (235-262) |
| <i>IFNA2</i>  | 24 / 28 (86%)  | 5'-ACATGATTTCCGATTCCTCCAGGAGGAG-3' (236-263) |
| <i>IFNA6</i>  | 24 / 28 (86%)  | 5'-ACATGATTTCCGATTCCTCCAGGAGGAG-3' (168-195) |
| <i>IFNA8</i>  | 24 / 28 (86%)  | 5'-ACATGATTTCCGATTCCTCCAGGAGGAG-3' (198-225) |
| <i>IFNA13</i> | 24 / 28 (86%)  | 5'-ACATGATTTCCGATTCCTCCAGGAGGAG-3' (237-264) |
| <i>IFNA5</i>  | 23 / 28 (82%)  | 5'-ACATGATTTCCGATTCCTCCAGGAGGAG-3' (225-252) |
| <i>IFNA17</i> | 23 / 28 (82%)  | 5'-ACATGATTTCCGATTCCTCCAGGAGGAG-3' (217-244) |
| <i>IFNA14</i> | 22 / 28 (79%)  | 5'-ACATGATTTCCGATTCCTCCAGGAGGAG-3' (212-239) |

Reverse PCR primer: R1, 5'-TTTTTCTAGGAGGCTCTGTTCCCAAGCAGC-3' to detect IFN- $\alpha$ 4 mRNA/AS RNA

| Gene Symbol   | Homology       | Sequence (Location in the gene)                |
|---------------|----------------|------------------------------------------------|
| <i>IFNA4</i>  | 30 / 30 (100%) | 5'-TTTTTCTAGGAGGCTCTGTTCCCAAGCAGC-3' (389-360) |
| <i>IFNA7</i>  | 30 / 30 (100%) | 5'-TTTTTCTAGGAGGCTCTGTTCCCAAGCAGC-3' (361-332) |
| <i>IFNA10</i> | 30 / 30 (100%) | 5'-TTTTTCTAGGAGGCTCTGTTCCCAAGCAGC-3' (367-338) |
| <i>IFNA17</i> | 30 / 30 (100%) | 5'-TTTTTCTAGGAGGCTCTGTTCCCAAGCAGC-3' (370-341) |
| <i>IFNA21</i> | 29 / 30 (97%)  | 5'-TTTTTCTAGGAGGCTCTGTTCCCAAGTAGC-3' (369-340) |
| <i>IFNA14</i> | 27 / 30 (90%)  | 5'-TTTTTCTAGGAGGCTCTCATCCCAAGCAGC-3' (365-336) |
| <i>IFNA2</i>  | 26 / 30 (87%)  | 5'-TTTGTCTAGGAGGCTCTCATCCCAAGCAGC-3' (386-357) |
| <i>IFNA16</i> | 26 / 30 (87%)  | 5'-TTTGTCTAGGAGGCTCTCATCCCAAGCAGC-3' (327-298) |
| <i>IFNA1</i>  | 25 / 30 (83%)  | 5'-TTTGTCTAGGAGGCTCTCATCCCAAGCAGC-3' (388-359) |
| <i>IFNA13</i> | 25 / 30 (83%)  | 5'-TTTGTCTAGGAGGCTCTCATCCCAAGCAGC-3' (390-361) |
| <i>IFNA6</i>  | 24 / 30 (80%)  | 5'-TTTGTCTAGAGCCTCTCATCCCAAGCAAC-3' (321-292)  |
| <i>IFNA5</i>  | 23 / 30 (77%)  | 5'-TTTGTCTAGAGTGCTCATCCCAAGTAGC-3' (378-349)   |
| <i>IFNA8</i>  | 23 / 30 (77%)  | 5'-TTTGTCTAGAGGCTCTCATCCCAAGCAGC-3' (351-322)  |

**IFN-α5 mRNA/AS RNA**

Forward PCR primer: F1B, 5'-CAGACCCACAGCCTGAGTAAC-3' to detect IFN-α5 mRNA/AS RNA

| Gene Symbol   | Homology       | Sequence (Location in the gene)       |
|---------------|----------------|---------------------------------------|
| <i>IFNA5</i>  | 21 / 21 (100%) | 5'-CAGACCCACAGCCTGAGTAAC-3' (139-159) |
| <i>IFNA4</i>  | 19 / 21 (90%)  | 5'-CAGACCCACAGCCTGGGTAAT-3' (150-170) |
| <i>IFNA6</i>  | 19 / 21 (90%)  | 5'-CAGACCCACAGCCTGGGTAC-3' (82-102)   |
| <i>IFNA7</i>  | 19 / 21 (90%)  | 5'-CAGACCCACAGCCTGGGTAAT-3' (122-142) |
| <i>IFNA8</i>  | 19 / 21 (90%)  | 5'-CAGACTCACAGCCTGGGTAAC-3' (112-132) |
| <i>IFNA10</i> | 19 / 21 (90%)  | 5'-CAGACCCACAGCCTGGGTAAT-3' (128-148) |
| <i>IFNA14</i> | 19 / 21 (90%)  | 5'-CAACCCACAGCCTGATAAC-3' (126-146)   |
| <i>IFNA17</i> | 19 / 21 (90%)  | 5'-CAGACCCACAGCCTGGGTAAT-3' (131-151) |
| <i>IFNA21</i> | 19 / 21 (90%)  | 5'-CAGACCCACAGCCTGGGTAAT-3' (130-150) |
| <i>IFNA1</i>  | 18 / 21 (86%)  | 5'-GAGACCCACAGCCTGGATAAC-3' (136-156) |
| <i>IFNA2</i>  | 18 / 21 (86%)  | 5'-CAACCCACAGCCTGGGTAGC-3' (150-170)  |
| <i>IFNA13</i> | 18 / 21 (86%)  | 5'-GAGACCCACAGCCTGGATAAC-3' (151-171) |
| <i>IFNA16</i> | 18 / 21 (86%)  | 5'-CAGACTCACAGCCTGGGTAAT-3' (88-108)  |

Reverse PCR primer: R1, 5'-GAATTTGTCTAGAAGTGCTCATCCCAAGT-3' to detect IFN-α5 mRNA/AS RNA

| Gene Symbol   | Homology       | Sequence (Location in the gene)               |
|---------------|----------------|-----------------------------------------------|
| <i>IFNA5</i>  | 30 / 30 (100%) | 5'-GAATTTGTCTAGAAGTGCTCATCCCAAGT-3' (381-352) |
| <i>IFNA2</i>  | 27 / 30 (90%)  | 5'-GAATTTGTCTAGGAGGTCTCATCCCAAGC-3' (389-360) |
| <i>IFNA16</i> | 27 / 30 (90%)  | 5'-GAATTTGTCTAGGAGGTCTCATCCCAAGC-3' (330-301) |
| <i>IFNA6</i>  | 26 / 30 (87%)  | 5'-GAGTTGTCTAGAAGCCTCTCATCCCAAGC-3' (324-295) |
| <i>IFNA14</i> | 26 / 30 (87%)  | 5'-GAATTTTCTAGGAGGTCTCATCCCAAGC-3' (368-339)  |
| <i>IFNA1</i>  | 25 / 30 (83%)  | 5'-GAATTTGTCTAGGAGTCTCATCCCAAGC-3' (391-362)  |
| <i>IFNA8</i>  | 25 / 30 (83%)  | 5'-GAATTCATCTAGAAGGTCTCATCCCAAGC-3' (354-325) |
| <i>IFNA13</i> | 25 / 30 (83%)  | 5'-GAATTTGTCTAGGAGTCTCATCCCAAGC-3' (393-364)  |
| <i>IFNA21</i> | 23 / 30 (77%)  | 5'-AAATTTTCTAGGAGCTCTGTCCCAAGT-3' (372-343)   |
| <i>IFNA4</i>  | 22 / 30 (73%)  | 5'-AAATTTTCTAGGAGCTCTGTCCCAAGC-3' (392-363)   |
| <i>IFNA7</i>  | 22 / 30 (73%)  | 5'-AAATTTTCTAGGAGCTCTGTCCCAAGC-3' (364-335)   |
| <i>IFNA10</i> | 22 / 30 (73%)  | 5'-AAATTTTCTAGGAGCTCTGTCCCAAGC-3' (370-341)   |
| <i>IFNA17</i> | 22 / 30 (73%)  | 5'-AAATTTTCTAGGAGCTCTGTCCCAAGC-3' (373-344)   |

**IFN-α6 mRNA/AS RNA**

Forward PCR primer: F1B, 5'-CTGGGTCACAGGAGGACCATGAT-3' to detect IFN-α6 mRNA/AS RNA

| Gene Symbol   | Homology       | Sequence (Location in the gene)          |
|---------------|----------------|------------------------------------------|
| <i>IFNA6</i>  | 23 / 23 (100%) | 5'-CTGGGTCACAGGAGGACCATGAT-3' (94-116)   |
| <i>IFNA1</i>  | 20 / 23 (87%)  | 5'-CTGGATAACAGGAGGACCTTGAT-3' (161-183)  |
| <i>IFNA2</i>  | 20 / 23 (87%)  | 5'-CTGGTAGCAGGAGGACCTTGAT-3' (162-184)   |
| <i>IFNA8</i>  | 20 / 23 (87%)  | 5'-CTGGGTAACAGGAGGACCTTGAT-3' (124-146)  |
| <i>IFNA13</i> | 20 / 23 (87%)  | 5'-CTGGATAACAGGAGGACCTTGAT-3' (163-185)  |
| <i>IFNA4</i>  | 19 / 23 (83%)  | 5'-CTGGGTAATAGGAGGACCTTGAT-3' (162-184)  |
| <i>IFNA5</i>  | 19 / 23 (83%)  | 5'-CTGAGTACAGGAGGACCTTGAT-3' (151-173)   |
| <i>IFNA10</i> | 19 / 23 (83%)  | 5'-CTGGGTAATAGGAGGACCTTGAT-3' (140-162)  |
| <i>IFNA16</i> | 19 / 23 (83%)  | 5'-CTGGGTAATAGGAGGACCTTGAT-3' (100-122)  |
| <i>IFNA17</i> | 19 / 23 (83%)  | 5'-CTGGGTAATAGGAGGACCTTGAT-3' (143-165)  |
| <i>IFNA21</i> | 19 / 23 (83%)  | 5'-CTGGGTAATAGGAGGACCTTGAT-3' (142-164)  |
| <i>IFNA7</i>  | 18 / 23 (78%)  | 5'-CTGCGTAAATAGGAGGACCTTGAT-3' (134-156) |
| <i>IFNA14</i> | 18 / 23 (78%)  | 5'-CTGAATAACAGGAGGACCTTGAT-3' (138-160)  |

Reverse PCR primer: R1, 5'-CTGAATCACCTCATGGAGGACAGAG-3' to detect IFN-α6 mRNA/AS RNA

| Gene Symbol   | Homology       | Sequence (Location in the gene)           |
|---------------|----------------|-------------------------------------------|
| <i>IFNA6</i>  | 25 / 25 (100%) | 5'-CTGAATCACCTCATGGAGGACAGAG-3' (255-231) |
| <i>IFNA1</i>  | 23 / 25 (92%)  | 5'-CTGGATCAGCTCATGGAGGACAGAG-3' (322-298) |
| <i>IFNA4</i>  | 23 / 25 (92%)  | 5'-CTGGATCATCTCATGGAGGACAGAG-3' (323-299) |
| <i>IFNA5</i>  | 23 / 25 (92%)  | 5'-CTGGATCATCTCATGGAGGACAGAG-3' (312-288) |
| <i>IFNA7</i>  | 23 / 25 (92%)  | 5'-CTGGATCATCTCATGGAGGACAGAG-3' (295-271) |
| <i>IFNA8</i>  | 23 / 25 (92%)  | 5'-CTGGATCATCTCATGGAGGACAGAG-3' (285-261) |
| <i>IFNA10</i> | 23 / 25 (92%)  | 5'-CTGGATCATCTCATGGAGGACAGAG-3' (301-277) |
| <i>IFNA13</i> | 23 / 25 (92%)  | 5'-CTGGATCAGCTCATGGAGGACAGAG-3' (324-300) |
| <i>IFNA14</i> | 23 / 25 (92%)  | 5'-CTGCATCATCTCATGGAGGACAGAG-3' (299-275) |
| <i>IFNA17</i> | 23 / 25 (92%)  | 5'-CTGGATCATCTCATGGAGGACAGAG-3' (304-280) |
| <i>IFNA21</i> | 23 / 25 (92%)  | 5'-CTGGATCATCTCATGGAGGACAGAG-3' (303-279) |
| <i>IFNA2</i>  | 22 / 25 (88%)  | 5'-CTGGATCATCTCATGGAGGACAGAG-3' (320-296) |
| <i>IFNA16</i> | 21 / 25 (84%)  | 5'-CTGGATCATCTCATGGAGGACAGAG-3' (261-237) |

**IFN- $\alpha$ 7 mRNA/AS RNA**Forward PCR primer: F2, 5'-GTACTCAGCTACAAATCCATCTGTCTC-3' to detect IFN- $\alpha$ 7 mRNA/AS RNA

| Gene symbol   | Homology       | Sequence (Location in the gene)             |
|---------------|----------------|---------------------------------------------|
| <i>IFNA7</i>  | 28 / 28 (100%) | 5'-GTACTCAGCTACAAATCCATCTGTCTC-3' (77-104)  |
| <i>IFNA4</i>  | 26 / 28 (93%)  | 5'-GTGCTCAGCTACAAATCCATCTGTCTC-3' (105-132) |
| <i>IFNA10</i> | 26 / 28 (93%)  | 5'-GTGCTCAGCTACAAATCCATCTGTCTC-3' (83-110)  |
| <i>IFNA16</i> | 26 / 28 (93%)  | 5'-GTGCTCAGCTACAAATCCATCTGTCTC-3' (43-70)   |
| <i>IFNA17</i> | 26 / 28 (93%)  | 5'-GTGCTCAGCTACAAATCCATCTGTCTC-3' (86-113)  |
| <i>IFNA21</i> | 26 / 28 (93%)  | 5'-GTGCTCAGCTACAAATCCATCTGTCTC-3' (85-112)  |
| <i>IFNA1</i>  | 23 / 28 (82%)  | 5'-GTGCTCAGCTGCAAGTCAAGCTGTCTC-3' (104-131) |
| <i>IFNA6</i>  | 23 / 28 (82%)  | 5'-GTGCTCAGCTGCAAGTCAAGCTGTCTC-3' (37-64)   |
| <i>IFNA8</i>  | 23 / 28 (82%)  | 5'-GTGCTCAGCTACAAGTCAATTCAGCTCTC-3' (67-94) |
| <i>IFNA13</i> | 23 / 28 (82%)  | 5'-GTGCTCAGCTGCAAGTCAAGCTGTCTC-3' (106-133) |
| <i>IFNA14</i> | 23 / 28 (82%)  | 5'-GTGCTCAGCTGCAAGTCAAGCTGTCTC-3' (81-108)  |
| <i>IFNA2</i>  | 22 / 28 (79%)  | 5'-GTGCTCAGCTGCAAGTCAAGCTGTCTG-3' (105-132) |
| <i>IFNA5</i>  | 22 / 28 (79%)  | 5'-GTGCTCAACTGCAAGTCAATCTGTCTC-3' (94-121)  |

Reverse PCR primer: R2, 5'-GCCATCAAACCTCTCTGGGAATCT-3' to detect IFN- $\alpha$ 7 mRNA/AS RNA

| Gene symbol   | Homology       | Sequence (Location in the gene)            |
|---------------|----------------|--------------------------------------------|
| <i>IFNA7</i>  | 27 / 27 (100%) | 5'-GCCATCAAACCTCTCTGGGAATCT-3' (244-218)   |
| <i>IFNA4</i>  | 25 / 27 (93%)  | 5'-GCCATCAAACCTCTCTGGGAATCC-3' (272-246)   |
| <i>IFNA6</i>  | 24 / 27 (89%)  | 5'-GCCATCAAACCTCTCTGGGAAATCT-3' (204-178)  |
| <i>IFNA21</i> | 24 / 27 (89%)  | 5'-GCCATCAAACCTCTCTGGGGAATCC-3' (252-226)  |
| <i>IFNA1</i>  | 23 / 27 (85%)  | 5'-GCCATCAAACCTCTCTGGGAAATCC-3' (271-245)  |
| <i>IFNA5</i>  | 23 / 27 (85%)  | 5'-GCCATCAAACCTCTCTGAGGAAATCC-3' (261-235) |
| <i>IFNA10</i> | 23 / 27 (85%)  | 5'-GCCATCAAACCTCTCTGGGGAATCC-3' (250-224)  |
| <i>IFNA13</i> | 23 / 27 (85%)  | 5'-GCCATCAAACCTCTCTGGGAAATCC-3' (273-247)  |
| <i>IFNA16</i> | 23 / 27 (85%)  | 5'-GCCATCAAACCTCTCTGGGGAATCC-3' (210-184)  |
| <i>IFNA17</i> | 22 / 27 (81%)  | 5'-GCCATCAAACCTCTCTGGGGAATCC-3' (253-227)  |
| <i>IFNA8</i>  | 21 / 27 (78%)  | 5'-ATCATCAAACCTCTCTGGGGAATCC-3' (234-208)  |
| <i>IFNA14</i> | 21 / 27 (78%)  | 5'-GCCATCAAATCTCTCTGGGGAATCC-3' (248-222)  |
| <i>IFNA2</i>  | 19 / 27 (70%)  | 5'-GTTGCCAAACCTCTCTGGGGAATCC-3' (272-246)  |

**IFN- $\alpha$ 8 mRNA/AS RNA**Forward PCR primer: F1B, 5'-CTATCT-ATAGGGCTTAAATTAGTTTGTTC-3' to detect IFN- $\alpha$ 8 mRNA/AS RNA

| Gene symbol   | Homology       | Sequence (Location in the gene)                  |
|---------------|----------------|--------------------------------------------------|
| <i>IFNA8</i>  | 30 / 30 (100%) | 5'-CTATCT-ATAGGGCTTAAATTAGTTTGTTC-3' (841-870)   |
| <i>IFNA1</i>  | 24 / 30 (80%)  | 5'-CTATTC-ATAAGATTAAATTAATTTTGTTC-3' (782-811)   |
| <i>IFNA2</i>  | 22 / 28 (79%)  | 5'-CTATTT-ATAAAC--AACTTATTTTGTTC-3' (875-902)    |
| <i>IFNA21</i> | 22 / 30 (73%)  | 5'-TTATTT-ATTAGATTAAATTAATTTTGTCC-3' (849-878)   |
| <i>IFNA16</i> | 20 / 30 (67%)  | 5'-CTATTT-TTAAGGTTAAATCATGTTTATG-3' (810-839)    |
| <i>IFNA17</i> | 20 / 30 (67%)  | 5'-TTATTT-TTAAGATTAAATTAATTTTATG-3' (849-878)    |
| <i>IFNA4</i>  | 19 / 30 (63%)  | 5'-TTATTT-TTAAATTTAAATTAATTTTATG-3' (864-893)    |
| <i>IFNA10</i> | 16 / 30 (53%)  | 5'-GTTTAA-ATATTTATTTAAATTAATTTTAAAA-3' (827-856) |
| <i>IFNA7</i>  | 14 / 30 (47%)  | 5'-TTATCT-AATGGAGAAGAAATACAGCCCTG-3' (496-525)   |
| <i>IFNA5</i>  | 14 / 31 (45%)  | 5'-CTATCTGACAGAGAAGAAATACAGCCCTGT-3' (513-543)   |
| <i>IFNA13</i> | 14 / 31 (45%)  | 5'-CTATCTGACAGAGAAGAAATACAGCCCTGT-3' (525-555)   |
| <i>IFNA6</i>  | 12 / 30 (40%)  | 5'-CTCTAT-ACTGAACCTTACCAGCAGCTGAAT-3' (322-351)  |
| <i>IFNA14</i> |                | No sequence in the sense strand matched to F1B.  |

Reverse PCR primer: R1, 5'-CATTCTTAAATCA-GT-TTGCAATC-3' to detect IFN- $\alpha$ 8 mRNA/AS RNA

| Gene symbol   | Homology       | Sequence (Location in the gene)             |
|---------------|----------------|---------------------------------------------|
| <i>IFNA8</i>  | 25 / 25 (100%) | 5'-CATTCTTAAATCA-GT-TTGCAATC-3' (1033-1009) |
| <i>IFNA2</i>  | 21 / 25 (84%)  | 5'-TATTCTGTAATCA-GG-TTGCAATC-3' (1073-1049) |
| <i>IFNA7</i>  | 16 / 26 (62%)  | 5'-AATCCTTTTTCAGT-TTGTGAAA-3' (594-569)     |
| <i>IFNA5</i>  | 14 / 25 (56%)  | 5'-CGATGTTGAACCA-GT-TTCATTCCT-3' (644-620)  |
| <i>IFNA10</i> | 14 / 25 (56%)  | 5'-CCATGTTGAACCA-GT-TTCATTCCT-3' (633-609)  |
| <i>IFNA16</i> | 14 / 25 (56%)  | 5'-CCATGTTGAATGA-GT-TTCATTCCT-3' (593-569)  |
| <i>IFNA17</i> | 14 / 25 (56%)  | 5'-CCATGTTGAACCA-GT-TTCATTCCT-3' (636-612)  |
| <i>IFNA21</i> | 14 / 25 (56%)  | 5'-AATAATAAGAA-GT-TTAAATAGTA-3' (992-968)   |
| <i>IFNA13</i> | 14 / 26 (54%)  | 5'-TCCTCCTTAATCT-TTCTTGCAAGTT-3' (631-606)  |
| <i>IFNA4</i>  | 13 / 25 (52%)  | 5'-TCCTCCTTAATCT-TT-TTGCAAGTT-3' (630-606)  |
| <i>IFNA6</i>  | 13 / 25 (52%)  | 5'-CATCAGTAAAGCA-AA-AGGCAAGCC-3' (3-27)     |
| <i>IFNA14</i> | 13 / 25 (52%)  | 5'-CACTCCTGAAAC-AT-TTGAAATTT-3' (751-727)   |
| <i>IFNA1</i>  | 12 / 25 (48%)  | 5'-AATAGATAATCA-GT-TTATCAGCAT-3' (766-742)  |

**IFN-α10 mRNA/AS RNA**

Forward PCR primer: F1B, 5'-ATTTCCGAATCCCCAGGAGGAGTT-3' to detect IFN-α10 mRNA/AS RNA

| Gene symbol   | Homology       | Sequence (Location in the gene)           |
|---------------|----------------|-------------------------------------------|
| <i>IFNA10</i> | 25 / 25 (100%) | 5'-ATTTCCGAATCCCCAGGAGGAGTT-3' (219-243)  |
| <i>IFNA4</i>  | 22 / 25 (88%)  | 5'-ATTTCCGATTCCCCAGGAGGAGTT-3' (241-265)  |
| <i>IFNA16</i> | 22 / 25 (88%)  | 5'-ATTTCCGATTCCCCAGGAGGAGTT-3' (179-203)  |
| <i>IFNA6</i>  | 21 / 25 (84%)  | 5'-ACTTCAGATTCCCCAGGAGGAGTT-3' (173-197)  |
| <i>IFNA21</i> | 21 / 25 (84%)  | 5'-ACTTTGGATTCCCCAGGAGGAGTT-3' (221-245)  |
| <i>IFNA1</i>  | 20 / 25 (80%)  | 5'-ACTTTGGATTCCCCAGGAGGAGTT-3' (240-264)  |
| <i>IFNA2</i>  | 20 / 25 (80%)  | 5'-ACTTTGGATTCCCCAGGAGGAGTT-3' (241-265)  |
| <i>IFNA7</i>  | 20 / 25 (80%)  | 5'-AATTCAGATTCCCAGGAGGAGTT-3' (213-237)   |
| <i>IFNA8</i>  | 20 / 25 (80%)  | 5'-ACTTTGATTCCCCAGGAGGAGTT-3' (203-227)   |
| <i>IFNA13</i> | 20 / 25 (80%)  | 5'-ACTTTGGATTCCCCAGGAGGAGTT-3' (242-266)  |
| <i>IFNA17</i> | 20 / 25 (80%)  | 5'-ACTTTGGACTTCCCCAGGAGGAGTT-3' (222-246) |
| <i>IFNA5</i>  | 19 / 25 (76%)  | 5'-ACTTTGGATTCCCTCAGGAGGAGTT-3' (230-254) |
| <i>IFNA14</i> | 18 / 25 (72%)  | 5'-ACTTTGATTCCCCAGGAGGAGTT-3' (217-241)   |

Reverse PCR primer: R1, 5'-TTCTAGGAGGCTCTGTCCCAAGCA-3' to detect IFN-α10 mRNA/AS RNA

| Gene symbol   | Homology       | Sequence (Location in the gene)           |
|---------------|----------------|-------------------------------------------|
| <i>IFNA10</i> | 25 / 25 (100%) | 5'-TTCTAGGAGGCTCTGTCCCAAGCA-3' (364-340)  |
| <i>IFNA17</i> | 25 / 25 (100%) | 5'-TTCTAGGAGGCTCTGTCCCAAGCA-3' (367-343)  |
| <i>IFNA4</i>  | 25 / 25 (100%) | 5'-TTCTAGGAGGCTCTGTCCCAAGCA-3' (386-362)  |
| <i>IFNA7</i>  | 25 / 25 (100%) | 5'-TTCTAGGAGGCTCTGTCCCAAGCA-3' (358-334)  |
| <i>IFNA21</i> | 24 / 25 (96%)  | 5'-TTCTAGGAGGCTCTGTCCCAAGTA-3' (366-342)  |
| <i>IFNA14</i> | 22 / 25 (88%)  | 5'-TTCTAGGAGGCTCTCATCCCAAGCA-3' (362-338) |
| <i>IFNA16</i> | 21 / 25 (84%)  | 5'-GTCTAGGAGGCTCTCATCCCAAGCA-3' (324-300) |
| <i>IFNA2</i>  | 21 / 25 (84%)  | 5'-GTCTAGGAGGCTCTCATCCCAAGCA-3' (383-359) |
| <i>IFNA1</i>  | 20 / 25 (80%)  | 5'-GTCTAGGAGGCTCTCATCCCAAGCA-3' (385-361) |
| <i>IFNA13</i> | 20 / 25 (80%)  | 5'-GTCTAGGAGGCTCTCATCCCAAGCA-3' (387-363) |
| <i>IFNA6</i>  | 20 / 25 (80%)  | 5'-GTCTAGAAGCTCTCATCCCAAGCA-3' (318-294)  |
| <i>IFNA5</i>  | 18 / 25 (72%)  | 5'-GTCTAGAAGTGTCTCATCCCAAGTA-3' (375-351) |
| <i>IFNA8</i>  | 13 / 25 (52%)  | 5'-TTCTGCTCTGACAACCTCCCAAGCA-3' (540-516) |

**IFN-α14 mRNA/AS RNA**

Forward PCR primer: F1B, 5'-CTGGGCTGTAATCTGTCTCAA-3' to detect IFN-α14 mRNA/AS RNA

| Gene Symbol   | Homeology      | Sequence(Location in the gene)        |
|---------------|----------------|---------------------------------------|
| <i>IFNA14</i> | 21 / 21 (100%) | 5'-CTGGGCTGTAATCTGTCTCAA-3' (108-128) |
| <i>IFNA2</i>  | 18 / 21 (86%)  | 5'-GTGGGCTGTGATCTGCCTCAA-3' (132-152) |
| <i>IFNA4</i>  | 18 / 21 (86%)  | 5'-CTGGGCTGTGATCTGCCTCAG-3' (132-152) |
| <i>IFNA5</i>  | 18 / 21 (86%)  | 5'-CTGGGCTGTGATCTGCCTCAG-3' (121-141) |
| <i>IFNA7</i>  | 18 / 21 (86%)  | 5'-CTGGGCTGTGATCTGCCTCAG-3' (104-124) |
| <i>IFNA8</i>  | 18 / 21 (86%)  | 5'-CTGGGCTGTGATCTGCCTCAG-3' (94-114)  |
| <i>IFNA16</i> | 18 / 21 (86%)  | 5'-CTGGGCTGTGATCTGCCTCAG-3' (70-90)   |
| <i>IFNA21</i> | 18 / 21 (86%)  | 5'-CTGGGCTGTGATCTGCCTCAG-3' (112-132) |
| <i>IFNA10</i> | 17 / 21 (81%)  | 5'-CTAGGCTGTGATCTGCCTCAG-3' (110-130) |
| <i>IFNA17</i> | 17 / 21 (81%)  | 5'-CTAGGCTGTGATCTGCCTCAG-3' (113-133) |
| <i>IFNA1</i>  | 16 / 21 (76%)  | 5'-CTGGGCTGTGATCTCCCTGAG-3' (118-138) |
| <i>IFNA13</i> | 16 / 21 (76%)  | 5'-CTGGGCTGTGATCTCCCTGAG-3' (133-153) |
| <i>IFNA6</i>  | 12 / 20 (60%)  | 5'-GAAGGCTG-AAGCCATCTCTG-3' (216-235) |

Reverse PCR primer: R1, 5'-AGAGATGGCTTGAGCTTTCTG-3' to detect IFN-α14 mRNA/AS RNA

| Gene Symbol   | Homeology      | Sequence(Location in the gene)        |
|---------------|----------------|---------------------------------------|
| <i>IFNA14</i> | 21 / 21 (100%) | 5'-AGAGATGGCTTGAGCTTTCTG-3' (278-258) |
| <i>IFNA4</i>  | 20 / 21 (95%)  | 5'-AGAGATGGCTTGAGCCTTCTG-3' (302-282) |
| <i>IFNA5</i>  | 20 / 21 (95%)  | 5'-AGAGATGGCTTGAGCCTTCTG-3' (291-271) |
| <i>IFNA8</i>  | 20 / 21 (95%)  | 5'-AGAGATGGCTTGAGCCTTCTG-3' (264-244) |
| <i>IFNA10</i> | 20 / 21 (95%)  | 5'-AGAGATGGCTTGAGCCTTCTG-3' (280-260) |
| <i>IFNA16</i> | 20 / 21 (95%)  | 5'-AGAGATGGCTTGAGCCTTCTG-3' (240-220) |
| <i>IFNA21</i> | 20 / 21 (95%)  | 5'-AGAGATGGCTTGAGCCTTCTG-3' (282-262) |
| <i>IFNA1</i>  | 19 / 21 (90%)  | 5'-AGAGATGGCTTGAGCCTTCTG-3' (301-281) |
| <i>IFNA6</i>  | 19 / 21 (90%)  | 5'-AGAGATGGCTTGAGCCTTCTG-3' (234-214) |
| <i>IFNA7</i>  | 19 / 21 (90%)  | 5'-AGAGATGGCTTGAGCCTTCTG-3' (274-254) |
| <i>IFNA13</i> | 19 / 21 (90%)  | 5'-AGAGATGGCTTGAGCCTTCTG-3' (303-283) |
| <i>IFNA17</i> | 19 / 21 (90%)  | 5'-AGAGATGGCTTGAGCCTTCTG-3' (283-263) |
| <i>IFNA2</i>  | 16 / 21 (76%)  | 5'-AGGATGGTTTCAGCCTTTCTG-3' (630-610) |

### IFN- $\alpha$ 16 mRNA/AS RNA

Forward PCR primer: F1B, 5'-TTTTCAGGAGTGTAAGAAGCA-3' to detect IFN- $\alpha$ 16 mRNA/AS RNA

| Gene symbol   | Homology       | Sequence (Location in the gene)        |
|---------------|----------------|----------------------------------------|
| <i>IFNA16</i> | 22 / 22 (100%) | 5'-TTTTCAGGAGTGTAAGAAGCA-3' (699-720)  |
| <i>IFNA14</i> | 22 / 22 (100%) | 5'-TTTTCAGGAGTGTAAGAAGCA-3' (740-761)  |
| <i>IFNA17</i> | 20 / 22 (91%)  | 5'-TTTTCAGCAGTGTAAGAAGCG-3' (742-763)  |
| <i>IFNA21</i> | 20 / 22 (91%)  | 5'-TTTTCAGGAGTGTAAGGAACA-3' (746-767)  |
| <i>IFNA10</i> | 19 / 22 (86%)  | 5'-TTTTCAGCAGTGTAAGAAGTG-3' (739-760)  |
| <i>IFNA8</i>  | 19 / 22 (86%)  | 5'-TTTTCAGGAGTGTAAAGCAACA-3' (730-751) |
| <i>IFNA4</i>  | 19 / 22 (86%)  | 5'-TTTTCAGCAGTGTGAAGAAGCT-3' (761-782) |
| <i>IFNA2</i>  | 16 / 22 (73%)  | 5'-TTTTTAGGAGTATTAATCAACA-3' (759-780) |
| <i>IFNA1</i>  | 14 / 21 (67%)  | 5'-ATCTCAGCA-AGCCAGAAGCA-3' (32-52)    |
| <i>IFNA13</i> | 14 / 21 (67%)  | 5'-ATCTCAGCA-AGCCAGAAGCA-3' (34-54)    |
| <i>IFNA5</i>  | 11 / 22 (50%)  | 5'-GTCCAGAGGCTCAAGCCATC-3' (267-288)   |
| <i>IFNA6</i>  | 11 / 22 (50%)  | 5'-GTCCAGAGGCTCAAGCCATC-3' (210-231)   |
| <i>IFNA7</i>  | 11 / 22 (50%)  | 5'-GTCCAGAGACTCAAGCCATC-3' (250-271)   |

Reverse PCR primer: R1, 5'-CATAAAACATGATTTAAACCT-TAAAAATAG-3' to detect IFN- $\alpha$ 16 mRNA/AS RNA

| Gene symbol   | Homology       | Sequence (Location in the gene)                 |
|---------------|----------------|-------------------------------------------------|
| <i>IFNA16</i> | 30 / 30 (100%) | 5'-CATAAAACATGATTTAAACCT-TAAAAATAG-3' (839-810) |
| <i>IFNA4</i>  | 25 / 30 (83%)  | 5'-CATAAAATAATTTAAATTT-TAAAAATA-3' (893-864)    |
| <i>IFNA17</i> | 23 / 30 (77%)  | 5'-ATAAAATAATTTAAATCT-TAAAAATA-3' (878-849)     |
| <i>IFNA1</i>  | 22 / 30 (73%)  | 5'-GAACAAAATAATTTAAATCT-TATGAATAG-3' (811-782)  |
| <i>IFNA2</i>  | 21 / 31 (68%)  | 5'-AATAAATAATTTAAATAATTTAAATAG-3' (871-841)     |
| <i>IFNA8</i>  | 20 / 30 (67%)  | 5'-GAACAAAATAATTTAAGCC-TATAGATAG-3' (870-841)   |
| <i>IFNA21</i> | 20 / 30 (67%)  | 5'-GGACAAAATAATTTAAATCT-AATAAATA-3' (878-849)   |
| <i>IFNA10</i> | 19 / 30 (63%)  | 5'-CTCATGATATACATAAAATTT-TAAAAATA-3' (874-845)  |
| <i>IFNA14</i> | 16 / 30 (53%)  | 5'-CATGATGCTTCTTTACTCC-TGAAAACAT-3' (766-737)   |
| <i>IFNA7</i>  | 15 / 30 (50%)  | 5'-GATGAACAGTTTCAATCCT-TCCTCCTTA-3' (623-594)   |
| <i>IFNA5</i>  | 14 / 30 (47%)  | 5'-AGGATCTCATGATTTCTGCTC-TGACAACTT-3' (580-551) |
| <i>IFNA6</i>  | 14 / 30 (47%)  | 5'-AGGATCTCATGATTTCTGCTC-TGACAACTT-3' (523-494) |
| <i>IFNA13</i> | 14 / 30 (47%)  | 5'-GGATCTCATGATTTCTGCTC-TGACAACTT-3' (592-563)  |

### IFN- $\alpha$ 17 mRNA/AS RNA

Forward PCR primer: F1B, 5'-CTAGGCTGTGATCTGCCTCAGAC-3' to detect IFN- $\alpha$ 17 mRNA/AS RNA

| Gene symbol   | Homology       | Sequence (Location in the gene)         |
|---------------|----------------|-----------------------------------------|
| <i>IFNA17</i> | 23 / 23 (100%) | 5'-CTAGGCTGTGATCTGCCTCAGAC-3' (113-135) |
| <i>IFNA10</i> | 23 / 23 (100%) | 5'-CTAGGCTGTGATCTGCCTCAGAC-3' (110-132) |
| <i>IFNA4</i>  | 22 / 23 (96%)  | 5'-CTGGGCTGTGATCTGCCTCAGAC-3' (132-154) |
| <i>IFNA5</i>  | 22 / 23 (96%)  | 5'-CTGGGCTGTGATCTGCCTCAGAC-3' (121-143) |
| <i>IFNA7</i>  | 22 / 23 (96%)  | 5'-CTGGGCTGTGATCTGCCTCAGAC-3' (104-126) |
| <i>IFNA8</i>  | 22 / 23 (96%)  | 5'-CTGGGCTGTGATCTGCCTCAGAC-3' (94-116)  |
| <i>IFNA16</i> | 22 / 23 (96%)  | 5'-CTGGGCTGTGATCTGCCTCAGAC-3' (70-92)   |
| <i>IFNA21</i> | 22 / 23 (96%)  | 5'-CTGGGCTGTGATCTGCCTCAGAC-3' (112-134) |
| <i>IFNA6</i>  | 21 / 23 (91%)  | 5'-CTGGACTGTGATCTGCCTCAGAC-3' (64-86)   |
| <i>IFNA2</i>  | 20 / 23 (87%)  | 5'-GTGGGCTGTGATCTGCCTCAAC-3' (132-154)  |
| <i>IFNA1</i>  | 20 / 23 (87%)  | 5'-CTGGGCTGTGATCTCCCTGAGAC-3' (131-153) |
| <i>IFNA13</i> | 20 / 23 (87%)  | 5'-CTGGGCTGTGATCTCCCTGAGAC-3' (133-155) |
| <i>IFNA14</i> | 19 / 23 (83%)  | 5'-CTGGGCTGTAATCTCTCTCAAC-3' (108-130)  |

Reverse PCR primer: R1, 5'-CCATCAAACCTCCTGGGGAAG-3' to detect IFN- $\alpha$ 17 mRNA/AS RNA

| Gene symbol   | Homology       | Sequence (Location in the gene)        |
|---------------|----------------|----------------------------------------|
| <i>IFNA17</i> | 23 / 23 (100%) | 5'-CCATCAAACCTCCTGGGGAAG-3' (252-230)  |
| <i>IFNA1</i>  | 22 / 23 (96%)  | 5'-CCATCAAACCTCCTGGGGAA-3' (270-248)   |
| <i>IFNA6</i>  | 22 / 23 (96%)  | 5'-CCATCAAACCTCCTGGGGAA-3' (203-181)   |
| <i>IFNA13</i> | 22 / 23 (96%)  | 5'-CCATCAAACCTCCTGGGGAA-3' (272-250)   |
| <i>IFNA5</i>  | 21 / 23 (91%)  | 5'-CCATCAAACCTCCTGAGGAA-3' (260-238)   |
| <i>IFNA10</i> | 21 / 23 (91%)  | 5'-CCATCAAACCTCCTGGGGAT-3' (249-227)   |
| <i>IFNA14</i> | 21 / 23 (91%)  | 5'-CCATCAAATCCTCCTGGGGAA-3' (247-225)  |
| <i>IFNA21</i> | 21 / 23 (91%)  | 5'-CCATCAAACCTCCTGGGGAA-3' (251-229)   |
| <i>IFNA8</i>  | 20 / 23 (87%)  | 5'-TCATCAAACCTCCTGGGGAA-3' (233-211)   |
| <i>IFNA4</i>  | 20 / 23 (87%)  | 5'-CCATCAAACCTCCTCGGGGA-3' (271-249)   |
| <i>IFNA16</i> | 20 / 23 (87%)  | 5'-CCATCAAACCTCCTGGGGAA-3' (209-187)   |
| <i>IFNA7</i>  | 19 / 23 (83%)  | 5'-CCATCAAACCTCCTCTGGGAA-3' (243-221)  |
| <i>IFNA2</i>  | 18 / 23 (78%)  | 5'-TGGCAAACCTCCTCCTGGGGAA-3' (271-249) |

**IFN- $\alpha$ 21 mRNA/AS RNA**

Forward PCR primer: F1B, 5'-TTTTGTCCATGTAATATTATGTGT-3' to detect IFN- $\alpha$ 21 mRNA/AS RNA

| Gene symbol   | Homology       | Sequence (Location in the gene)            |
|---------------|----------------|--------------------------------------------|
| <i>IFNA21</i> | 24 / 24 (100%) | 5'-TTTTGTCCATGTAATATTATGTGT-3' (871-894)   |
| <i>IFNA8</i>  | 20 / 24 (83%)  | 5'-TTTTGTTTCATATATATATTATGTGA-3' (863-886) |
| <i>IFNA17</i> | 19 / 24 (79%)  | 5'-ATTTTTCATGTAATATCATGTGT-3' (869-892)    |
| <i>IFNA1</i>  | 18 / 24 (75%)  | 5'-TTTTGTTCATATAACGTCATGTGC-3' (804-827)   |
| <i>IFNA2</i>  | 18 / 24 (75%)  | 5'-TTTTGTTTCATATATGTTCATGTGC-3' (895-918)  |
| <i>IFNA4</i>  | 17 / 24 (71%)  | 5'-TATTTTTCATGTGATATCATGAGT-3' (883-906)   |
| <i>IFNA10</i> | 17 / 24 (71%)  | 5'-TGTGGTTAATGTAACAATATATGT-3' (886-909)   |
| <i>IFNA16</i> | 17 / 24 (71%)  | 5'-CATGTTTCATGTAATATCATGTGT-3' (829-852)   |
| <i>IFNA13</i> | 15 / 24 (63%)  | 5'-TCTTTACCACAAAAGATTCATCTGC-3' (338-362)  |
| <i>IFNA5</i>  | 12 / 24 (50%)  | 5'-TGTCCTCCATGAGATAATCCAGCA-3' (291-314)   |
| <i>IFNA7</i>  | 12 / 24 (50%)  | 5'-AATTTTCCACTGAACCTTACCAGC-3' (360-383)   |
| <i>IFNA14</i> | 11 / 24 (46%)  | 5'-TGTCCTCCATGAGATGATGCAGCA-3' (278-301)   |
| <i>IFNA6</i>  | 10 / 24 (42%)  | 5'-TGTCCTCCATGAGGTGATTCAGCA-3' (234-257)   |

Reverse PCR primer: R1, 5'-TAAAGAATAAACAAAT-AATATAAGAAGTTT-3' to detect IFN- $\alpha$ 21 mRNA/AS RNA

| Gene symbol   | Homology       | Sequence (Location in the gene)                  |
|---------------|----------------|--------------------------------------------------|
| <i>IFNA21</i> | 30 / 30 (100%) | 5'-TAAAGAATAAACAAAT-AATATAAGAAGTTT-3' (1005-976) |
| <i>IFNA4</i>  | 20 / 30 (67%)  | 5'-TTAAATAATAATAAAT-AATTAATAAATAG-3' (873-844)   |
| <i>IFNA8</i>  | 20 / 30 (67%)  | 5'-TAAAGAATAAATAAAG-AATTTTCTATAGT-3' (990-961)   |
| <i>IFNA2</i>  | 19 / 30 (63%)  | 5'-TAAAGAATAACAAGT-ACAAAAGTTCCAT-3' (1030-1001)  |
| <i>IFNA17</i> | 19 / 31 (61%)  | 5'-TAAATGAAAAGGAAATTAATATATGGCTAA-3' (966-936)   |
| <i>IFNA1</i>  | 18 / 30 (60%)  | 5'-AAATAAATATTTAAAT-AGATAATCAGTTT-3' (779-750)   |
| <i>IFNA10</i> | 17 / 30 (57%)  | 5'-AAATAATTAATAAAT-AATTAACAAAAGA-3' (850-821)    |
| <i>IFNA16</i> | 17 / 30 (57%)  | 5'-AGTTAATAAATAAAT-AATTAATAAATAG-3' (811-782)    |
| <i>IFNA13</i> | 16 / 30 (53%)  | 5'-ATATGAGTCAATAAGA-ATTGTTTCATGTTG-3' (678-649)  |
| <i>IFNA7</i>  | 15 / 30 (50%)  | 5'-TGTTGAAAAGAGAAG-GATCTCATGATTC-3' (577-548)    |
| <i>IFNA14</i> | 15 / 30 (50%)  | 5'-TTTACTCCTGAAA-CATTTGAAAATTTT-3' (755-726)     |
| <i>IFNA5</i>  | 14 / 30 (47%)  | 5'-TGCTGATAAAGAGAAG-GATCTCATGATTC-3' (594-565)   |
| <i>IFNA6</i>  | 12 / 30 (40%)  | 5'-TCCTTCTCCTTAACC-TTCTTGCAAGTTT-3' (566-537)    |
